# Supplementary material for: Change Point Analysis for Detecting Vaccine Safety Signals
Source: MDPI journal article supplement (doi:10.3390/vaccines9030206), 2021-03-02
Supplement: s1 [file s1]

**Table S1.** The confusion matrix for a simulation model: Possible results from a binary classifier.

| Classified condition | Condition determined by “Gold Standard” |                                           |                                           |
|----------------------|-----------------------------------------|-------------------------------------------|-------------------------------------------|
|                      | Positive                                |                                           | Negative                                  |
|                      | Positive<br>Negative                    | True Positive (TP)<br>False Negative (FN) | False Positive (FP)<br>True Negative (TN) |

**Table S2.** Statistics for performance assessment derived from the confusion matrix.

| Metrics           | Formula                                             | Definition                                                                                                                                  |
|-------------------|-----------------------------------------------------|---------------------------------------------------------------------------------------------------------------------------------------------|
| Accuracy          | $\frac{TP + TN}{TP + FP + FN + TN}$                 | The proportion of correctly classified observations                                                                                         |
| Sensitivity       | $\frac{TP}{TP + FN}$                                | The proportion of positive cases correctly predicted                                                                                        |
| Specificity       | $\frac{TN}{FP + TN}$                                | The proportion of negative cases correctly predicted                                                                                        |
| PPV               | $\frac{TP}{TP + FP}$                                | The proportion of true positive in the total of positive predictions                                                                        |
| NPV               | $\frac{TN}{FN + TN}$                                | The proportion of true negatives in the total of negative predictions                                                                       |
| Balanced accuracy | $\frac{\text{Sensitivity} + \text{Specificity}}{2}$ | The arithmetic means of the two metrics (sensitivity and specificity), that is the highest powerful and useful when the classes imbalanced. |

Abbreviations: PPV, Positive predicted value; NPV, Negative predicted value; TP, True Positive; FP, False Positive; FN, False Negative; TN, True Negative.

**Table S3.** Summary of performance results obtained with the three change point analysis methods on the 1,000 simulated data for 25 scenes.

|                             | Mean baseline number of reports |                |            |      |                |            |      |                |            |      |                |            |      |                |            |
|-----------------------------|---------------------------------|----------------|------------|------|----------------|------------|------|----------------|------------|------|----------------|------------|------|----------------|------------|
|                             | 1                               |                |            | 5    |                |            | 10   |                |            | 50   |                |            | 100  |                |            |
|                             | BCP                             | Taylor<br>-CPA | Env<br>Cpt | BCP  | Taylor<br>-CPA | Env<br>Cpt | BCP  | Taylor<br>-CPA | Env<br>Cpt | BCP  | Taylor<br>-CPA | Env<br>Cpt | BCP  | Taylor<br>-CPA | Env<br>Cpt |
| 1.5-fold increase in number |                                 |                |            |      |                |            |      |                |            |      |                |            |      |                |            |
| accuracy                    | 96%                             | 96%            | 95%        | 96%  | 96%            | 96%        | 96%  | 97%            | 97%        | 98%  | 99%            | 100%       | 99%  | 99%            | 100%       |
| sensitivity                 | 1%                              | 7%             | 6%         | 1%   | 35%            | 13%        | 3%   | 62%            | 38%        | 49%  | 97%            | 98%        | 85%  | 100%           | 100%       |
| specificity                 | 100%                            | 99%            | 99%        | 100% | 99%            | 99%        | 100% | 98%            | 99%        | 100% | 99%            | 100%       | 100% | 99%            | 100%       |
| PPV                         | 8%                              | 25%            | 19%        | 39%  | 48%            | 44%        | 67%  | 61%            | 66%        | 99%  | 82%            | 96%        | 100% | 84%            | 98%        |
| NPV                         | 96%                             | 96%            | 96%        | 96%  | 97%            | 97%        | 96%  | 98%            | 98%        | 98%  | 100%           | 100%       | 99%  | 100%           | 100%       |
| balanced accuracy           | 50%                             | 53%            | 52%        | 50%  | 67%            | 56%        | 52%  | 80%            | 69%        | 75%  | 98%            | 99%        | 93%  | 99%            | 100%       |
| 3-fold increase in number   |                                 |                |            |      |                |            |      |                |            |      |                |            |      |                |            |
| accuracy                    | 96%                             | 97%            | 97%        | 98%  | 99%            | 100%       | 99%  | 99%            | 100%       | 100% | 99%            | 100%       | 100% | 99%            | 100%       |
| sensitivity                 | 5%                              | 61%            | 47%        | 53%  | 97%            | 98%        | 87%  | 100%           | 100%       | 100% | 100%           | 100%       | 100% | 100%           | 100%       |
| specificity                 | 100%                            | 98%            | 99%        | 100% | 99%            | 100%       | 100% | 99%            | 100%       | 100% | 99%            | 100%       | 100% | 99%            | 100%       |
| PPV                         | 34%                             | 61%            | 59%        | 96%  | 82%            | 96%        | 98%  | 84%            | 97%        | 100% | 84%            | 98%        | 100% | 85%            | 98%        |
| NPV                         | 96%                             | 98%            | 98%        | 98%  | 100%           | 100%       | 99%  | 100%           | 100%       | 100% | 100%           | 100%       | 100% | 100%           | 100%       |
| balanced accuracy           | 52%                             | 80%            | 73%        | 77%  | 98%            | 99%        | 93%  | 99%            | 100%       | 100% | 100%           | 100%       | 100% | 100%           | 100%       |
| 5-fold increase in number   |                                 |                |            |      |                |            |      |                |            |      |                |            |      |                |            |
| accuracy                    | 97%                             | 99%            | 99%        | 100% | 99%            | 100%       | 100% | 99%            | 100%       | 100% | 99%            | 100%       | 100% | 99%            | 100%       |
| sensitivity                 | 27%                             | 91%            | 90%        | 95%  | 100%           | 100%       | 100% | 100%           | 100%       | 100% | 100%           | 100%       | 100% | 100%           | 100%       |
| specificity                 | 99%                             | 99%            | 99%        | 100% | 99%            | 100%       | 100% | 99%            | 100%       | 100% | 99%            | 100%       | 100% | 99%            | 100%       |
| PPV                         | 68%                             | 78%            | 84%        | 96%  | 84%            | 98%        | 97%  | 83%            | 97%        | 99%  | 83%            | 98%        | 100% | 85%            | 98%        |
| NPV                         | 97%                             | 100%           | 100%       | 100% | 100%           | 100%       | 100% | 100%           | 100%       | 100% | 100%           | 100%       | 100% | 100%           | 100%       |
| balanced accuracy           | 63%                             | 95%            | 95%        | 97%  | 100%           | 100%       | 100% | 100%           | 100%       | 100% | 100%           | 100%       | 100% | 100%           | 100%       |
| 10-fold increase in number  |                                 |                |            |      |                |            |      |                |            |      |                |            |      |                |            |
| accuracy                    | 98%                             | 99%            | 100%       | 100% | 99%            | 100%       | 100% | 99%            | 100%       | 100% | 99%            | 100%       | 100% | 99%            | 100%       |
| sensitivity                 | 81%                             | 99%            | 98%        | 100% | 100%           | 100%       | 100% | 100%           | 100%       | 100% | 100%           | 100%       | 100% | 100%           | 100%       |
| specificity                 | 99%                             | 99%            | 100%       | 100% | 99%            | 100%       | 100% | 99%            | 100%       | 100% | 99%            | 100%       | 100% | 99%            | 100%       |
| PPV                         | 80%                             | 84%            | 90%        | 93%  | 84%            | 98%        | 96%  | 84%            | 97%        | 99%  | 84%            | 98%        | 99%  | 85%            | 98%        |
| NPV                         | 99%                             | 100%           | 100%       | 100% | 100%           | 100%       | 100% | 100%           | 100%       | 100% | 100%           | 100%       | 100% | 100%           | 100%       |
| balanced accuracy           | 90%                             | 99%            | 99%        | 100% | 100%           | 100%       | 100% | 100%           | 100%       | 100% | 100%           | 100%       | 100% | 100%           | 100%       |
| 50-fold increase in number  |                                 |                |            |      |                |            |      |                |            |      |                |            |      |                |            |
| accuracy                    | 99%                             | 99%            | 99%        | 100% | 99%            | 100%       | 100% | 99%            | 100%       | 100% | 99%            | 100%       | 100% | 99%            | 100%       |
| sensitivity                 | 100%                            | 100%           | 98%        | 100% | 100%           | 100%       | 100% | 100%           | 100%       | 100% | 100%           | 100%       | 100% | 100%           | 100%       |
| specificity                 | 99%                             | 99%            | 100%       | 100% | 99%            | 100%       | 100% | 99%            | 100%       | 100% | 99%            | 100%       | 100% | 99%            | 100%       |
| PPV                         | 79%                             | 84%            | 90%        | 92%  | 85%            | 98%        | 95%  | 83%            | 97%        | 98%  | 84%            | 98%        | 98%  | 85%            | 98%        |
| NPV                         | 100%                            | 100%           | 100%       | 100% | 100%           | 100%       | 100% | 100%           | 100%       | 100% | 100%           | 100%       | 100% | 100%           | 100%       |
| balanced accuracy           | 99%                             | 100%           | 99%        | 100% | 100%           | 100%       | 100% | 100%           | 100%       | 100% | 100%           | 100%       | 100% | 100%           | 100%       |

Abbreviations: BCP, the Bayesian change point; Taylor-CPA, Taylor's change point analysis; EnvCpt, the environmental time series change point detection; PPV, positive predictive value; NPV, negative predictive value.

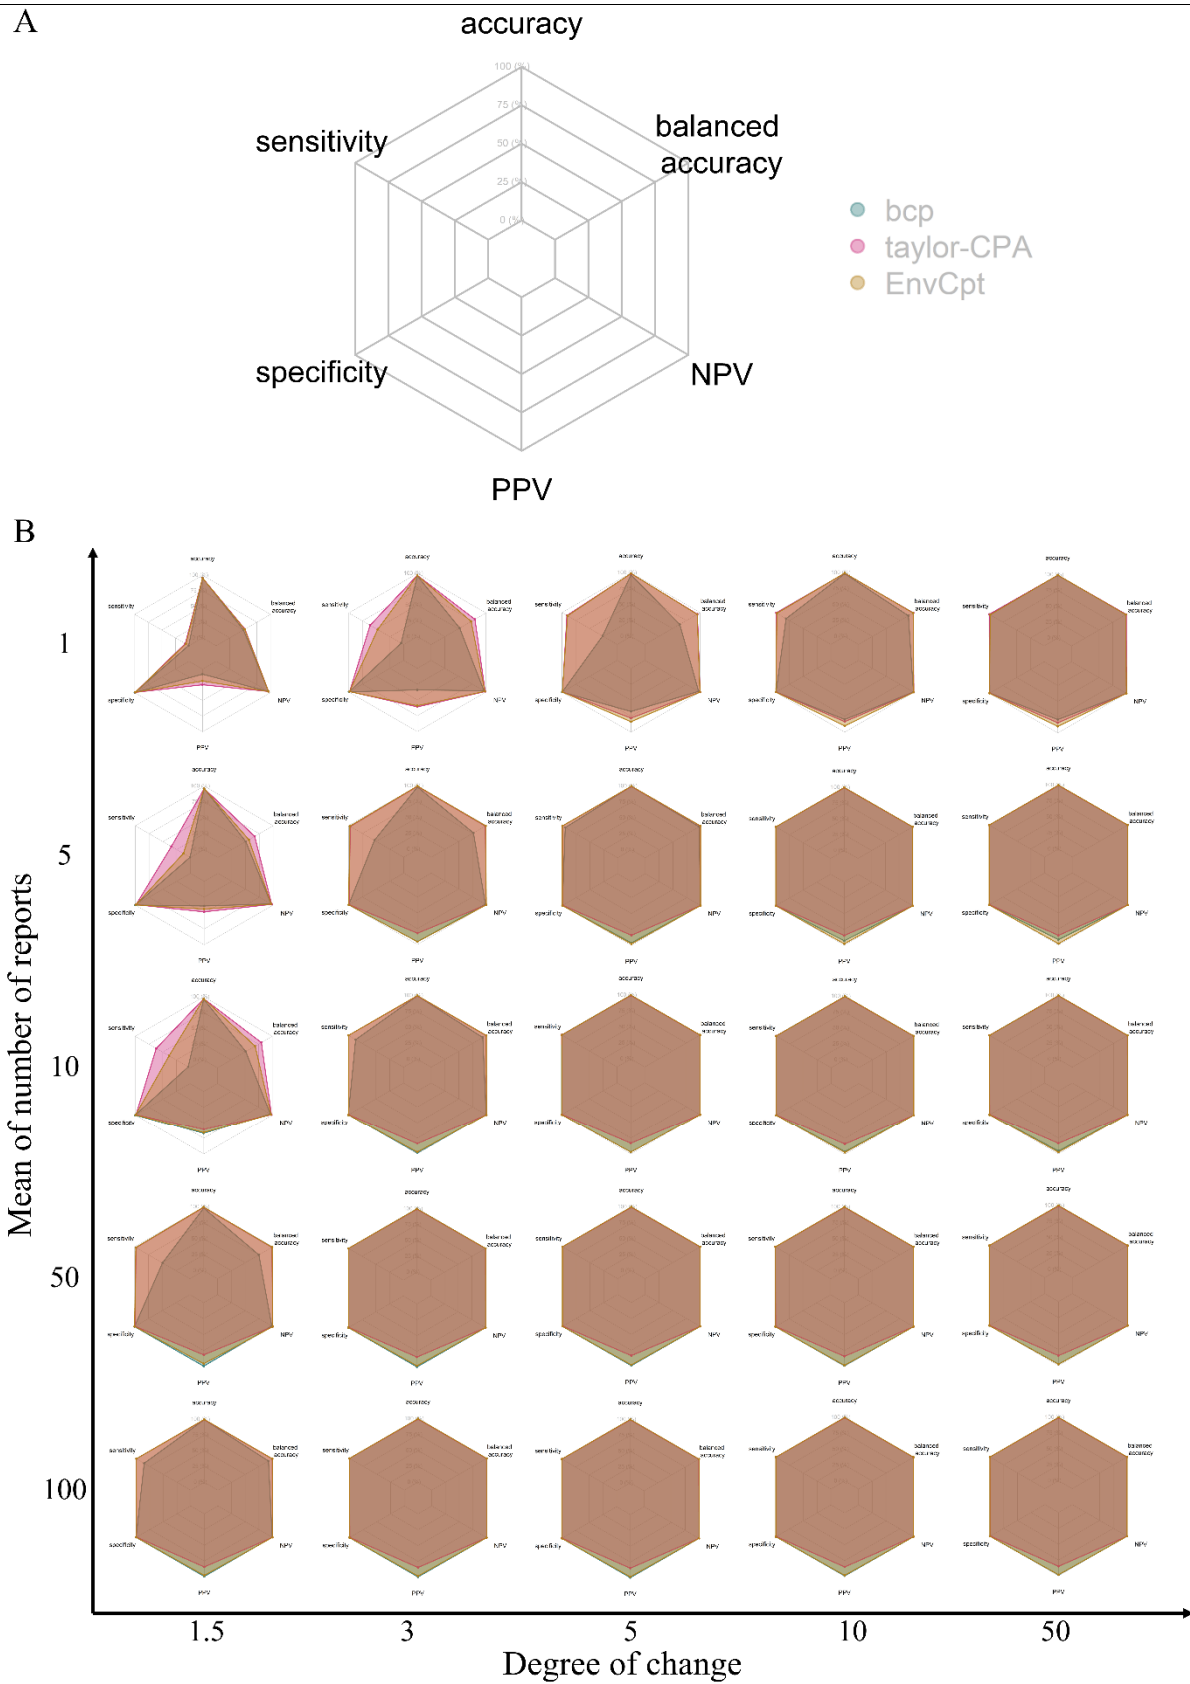

**Figure S1.** Data visualization with a radar chart is defined (A) and 25 scenes of the simulation are visualized combined mean of the reports and degree of change using 6 metrics of the confusion matrix (B): accuracy; sensitivity; specificity; positive predicted value; negative predicted value; balanced accuracy.

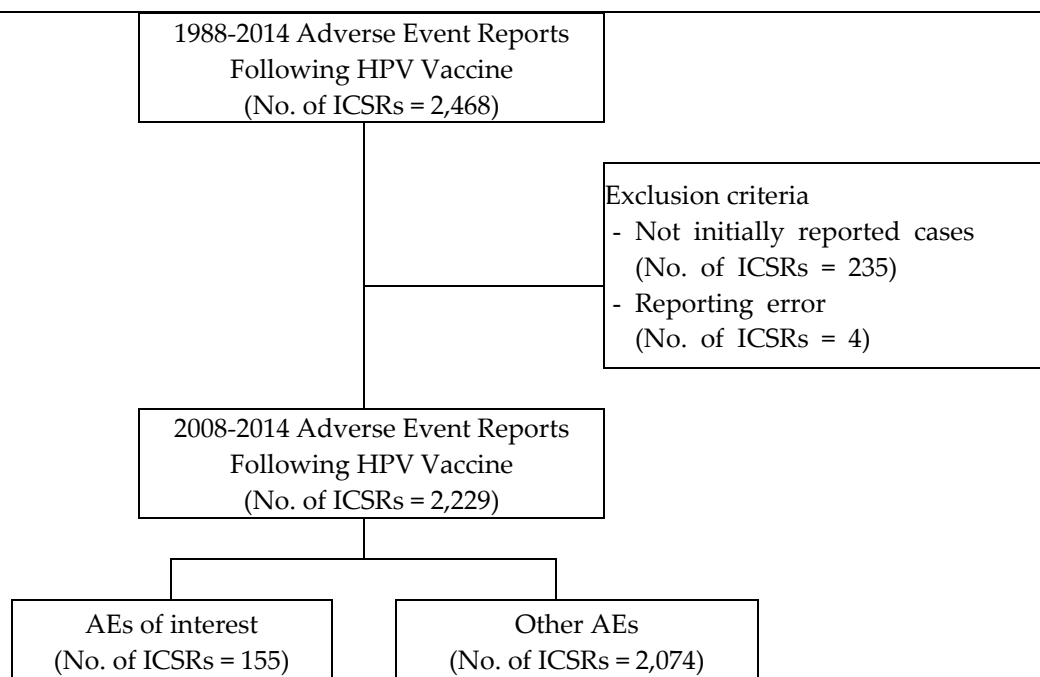

**Figure S2.** Flow diagram of individual case safety reports. Abbreviations: ICSRs, Individual Case Safety Reports; AEs, Adverse Events; HPV, human papillomavirus.

**Table S4.** Characteristics of individual case safety reports of syncope or dizziness and other events following human papillomavirus vaccine.

| Characteristics                | Total reports<br>(N = 2,229) | Reports of syncope<br>or dizziness<br>(N = 155) | Other AEs<br>(N = 2074) | p-value |
|--------------------------------|------------------------------|-------------------------------------------------|-------------------------|---------|
|                                | N (%)                        | N (%)                                           | N (%)                   |         |
| Sex                            |                              |                                                 |                         | 0.4341  |
| Male                           | 22 (1)                       | 0 (0)                                           | 22 (1.1)                |         |
| Female                         | 2,133 (95.7)                 | 150 (96.8)                                      | 1,983 (95.6)            |         |
| Unknown                        | 74 (3.3)                     | 5 (3.2)                                         | 69 (3.3)                |         |
| Age                            |                              |                                                 |                         | 0.0027  |
| 24 months - 11 years old       | 30 (1.3)                     | 0 (0)                                           | 30 (1.4)                |         |
| 12 - 18 years old              | 201 (9)                      | 20 (12.9)                                       | 181 (8.7)               |         |
| 19 - 64 years old              | 1,006 (45.1)                 | 85 (54.8)                                       | 921 (44.4)              |         |
| Unknown                        | 992 (44.5)                   | 50 (32.3)                                       | 942 (45.4)              |         |
| Year report was received       |                              |                                                 |                         | <0.0001 |
| 2008                           | 32 (1.4)                     | 10 (6.5)                                        | 22 (1.1)                |         |
| 2009                           | 55 (2.5)                     | 7 (4.5)                                         | 48 (2.3)                |         |
| 2010                           | 116 (5.2)                    | 13 (8.4)                                        | 103 (5.)                |         |
| 2011                           | 200 (9.)                     | 24 (15.5)                                       | 176 (8.5)               |         |
| 2012                           | 126 (5.7)                    | 6 (3.9)                                         | 120 (5.8)               |         |
| 2013                           | 1,061 (47.6)                 | 47 (30.3)                                       | 1,014 (48.9)            |         |
| 2014                           | 639 (28.7)                   | 48 (31)                                         | 591 (28.5)              |         |
| Report Type                    |                              |                                                 |                         | <0.0001 |
| Spontaneous report             | 1,129 (50.7)                 | 116 (74.8)                                      | 1,013 (48.8)            |         |
| Research (including PMS)       | 1,081 (48.5)                 | 34 (21.9)                                       | 1,047 (50.5)            |         |
| Literature                     | 1 (0)                        | 0 (0)                                           | 1 (0)                   |         |
| Others                         | 18 (0.8)                     | 5 (3.2)                                         | 13 (0.6)                |         |
| Original reporter              |                              |                                                 |                         | <0.0001 |
| Healthcare professionals       | 1,556 (69.8)                 | 89 (57.4)                                       | 1,467 (70.7)            |         |
| Consumers                      | 332 (14.9)                   | 27 (17.4)                                       | 305 (14.7)              |         |
| Others                         | 204 (9.2)                    | 21 (13.5)                                       | 183 (8.8)               |         |
| Unknown                        | 137 (6.1)                    | 18 (11.6)                                       | 119 (5.7)               |         |
| Reporter                       |                              |                                                 |                         | 0.0006  |
| Regional PV centers            | 28 (1.3)                     | 8 (5.2)                                         | 20 (1.)                 |         |
| Manufacturer                   | 2,073 (93.0)                 | 137 (88.4)                                      | 1,936 (93.3)            |         |
| Medical institution            | 2 (0.1)                      | 0 (0)                                           | 2 (0.1)                 |         |
| Pharmacy                       | 1 (0)                        | 0 (0)                                           | 1 (0)                   |         |
| Consumer                       | 120 (5.4)                    | 10 (6.5)                                        | 110 (5.3)               |         |
| Others                         | 5 (0.2)                      | 0 (0)                                           | 5 (0.2)                 |         |
| Serious adverse event          |                              |                                                 |                         | <0.0001 |
| Yes                            | 135 (6.1)                    | 34 (21.9)                                       | 101 (4.9)               |         |
| No                             | 2,094 (93.9)                 | 121 (78.1)                                      | 1,973 (95.1)            |         |
| Serious adverse event category |                              |                                                 |                         |         |
| Disability                     | 3 (2.2)                      | 0 (0)                                           | 3 (3)                   | 0.5718  |
| Life threatening               | 1 (0.7)                      | 0 (0)                                           | 1 (1)                   | 0.7481  |
| Hospitalization                | 47 (34.8)                    | 9 (26.5)                                        | 38 (37.6)               | 0.2377  |
| Other medical events           | 91 (67.4)                    | 28 (82.4)                                       | 63 (62.4)               | 0.0316  |

---

Abbreviations: AE, adverse events; HPV, human papillomavirus; PMS, post marketing surveillance; PV, pharmacovigilance.
